# Supplementary material
Source: PubMed Central journal article supplement (PMC2684834)

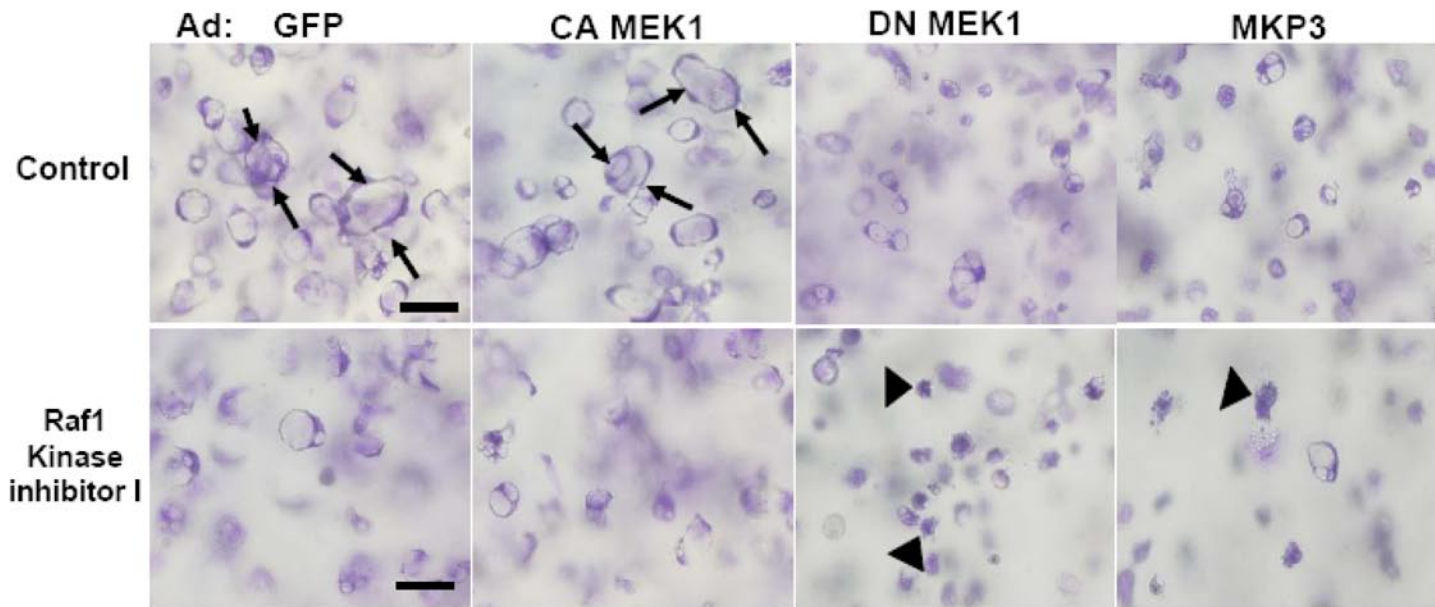

Supplement: supp_122_11_1812__1.pdf [file supp_122_11_1812__1.pdf]
